# 1 **Molecular Basis of Antibiotic Self-Resistance in a Bee Larvae**

## 2 **Pathogen**

3 Tam Dang<sup>1</sup>, Bernhard Loll<sup>2</sup>, Sebastian Müller<sup>1</sup>, Ranko Skobalj<sup>1</sup>, Julia Ebeling<sup>3</sup>, Timur  
4 Bulatov<sup>1</sup>, Sebastian Gensel<sup>1</sup>, Josefine Göbel<sup>3</sup>, Markus C. Wahl<sup>2,4</sup>, Elke Genersch<sup>3,5</sup>, Andi  
5 Mainz<sup>1</sup>, Roderich D. Süssmuth<sup>1,#</sup>

6

7 <sup>1</sup> Institut für Chemie, Technische Universität Berlin, Berlin, Germany

8 <sup>2</sup> Institut für Chemie und Biochemie, Strukturbiochemie, Freie Universität Berlin, Berlin,  
9 Germany

10 <sup>3</sup> Department of Molecular Microbiology and Bee Diseases, Institute for Bee Research,  
11 Hohen Neuendorf, Germany

12 <sup>4</sup> Macromolecular Crystallography, Helmholtz Zentrum Berlin für Materialien und Energie,  
13 Berlin, Germany

14 <sup>5</sup> Institut für Mikrobiologie und Tiersuchen, Fachbereich Vetrinärmedizin, Freie Universität  
15 Berlin, Berlin, Germany

16 # Correspondence to: roderich.suessmuth@tu-berlin.de

## 17 **Abstract**

18 *Paenibacillus larvae*, the causative agent of the devastating honey-bee disease American  
19 Foulbrood, produces the cationic polyketide-peptide hybrid paenilamicin that displays high  
20 antibacterial and antifungal activity. Its biosynthetic gene cluster contains a gene coding for  
21 the *N*-acetyltransferase PamZ. We show that PamZ acts as self-resistance factor in *P. larvae*  
22 by deactivation of paenilamicin. Using tandem MS, NMR spectroscopy and synthetic  
23 diastereomers, we identified the N-terminal amino group of the agmatinamic acid as the *N*-  
24 acetylation site. These findings highlight the pharmacophore region of paenilamicin, which we  
25 very recently identified as a new ribosome inhibitor. Here, we further elucidated the crystal  
26 structure of PamZ:acetyl-CoA complex at 1.34 Å resolution. An unusual tandem-domain  
27 architecture provides a well-defined substrate-binding groove decorated with negatively-  
28 charged residues to specifically attract the cationic paenilamicin. Our results will help to  
29 understand the mode of action of paenilamicin and its role in pathogenicity of *P. larvae* to fight  
30 American Foulbrood.

## 31 **Introduction**

32 Pollination of wild and cultivated flowering plants is an indispensable ecosystem service, which  
33 is mainly provided by pollinating insects. Among the insect pollinators, managed honey bee  
34 colonies play a particularly important role in agriculture, where they are widely used as  
35 commercial pollinators and contribute to 35% of the production volume of global food crops<sup>1</sup>.

36 In order to secure human food supply, it is therefore important to ensure the health of honey  
37 bees, which is continuously threatened by various viral, bacterial and fungal pathogens as well  
38 as metazoan parasites<sup>2</sup>.

39 The Gram-positive, facultative anaerobic, spore-forming bacterium, *Paenibacillus larvae*  
40 (*P. larvae*), is the causative agent of the epizootic American Foulbrood (AFB) of honey bees<sup>3</sup>.  
41 AFB is a fatal intestinal infection of the honey bee brood initiated in first instar larvae by  
42 ingestion of spore-contaminated food. The distribution of the spores, the infectious form of  
43 *P. larvae*, within a colony and between colonies, also within apiary and between apiaries<sup>4</sup>,  
44 consequently leads to honey bee colony losses. *P. larvae* comprises the four well-described  
45 genotypes ERIC I to ERIC IV<sup>3</sup> which differ in virulence on the larval<sup>5</sup> and colony level<sup>6</sup> as well  
46 as in pathogenesis strategies employed to kill the host<sup>7</sup>. The existence of another ERIC  
47 genotype, ERIC V, has recently been proposed<sup>8</sup>. From contemporary outbreaks of AFB all  
48 over the world, only *P. larvae* ERIC I and ERIC II can be isolated<sup>9</sup> suggesting that the  
49 hypervirulent genotypes ERIC III to ERIC V did not become established in the honey bee  
50 population.

51 In our quest to find sustainable control measures against this most serious bacterial disease  
52 of honey bees, we started to unravel AFB pathogenesis by analyzing the interaction between  
53 *P. larvae* and honey bee larvae on a molecular level. We identified several virulence factors of  
54 *P. larvae* ERIC I and ERIC II and showed that two AB toxins<sup>10,11</sup>, a chitin-degrading enzyme<sup>12,13</sup>  
55 and also an S-layer protein<sup>14,15</sup> have a pivotal role in the virulence of this pathogen and that  
56 *P. larvae* also produces various secondary metabolites<sup>16</sup>. Bacterial secondary metabolites,  
57 with polyketides and (non-)ribosomal peptides as important representatives, provide highly  
58 valuable lead structures, among them antibiotics with novel modes of actions for drug  
59 development to fight various infectious diseases<sup>17,18</sup>. Secondary metabolites can also act as  
60 virulence(-like) factors, functioning as signal molecules in gene regulation of defense or growth  
61 mechanisms<sup>19-21</sup>. The search for secondary metabolites produced by *P. larvae* led to the  
62 structural elucidation of paenilamicin that shows cytotoxic, antibacterial and antifungal  
63 activities<sup>22,23</sup>. It is currently assumed that paenilamicin is produced as a defense molecule  
64 against microbial competitors, since only *P. larvae* can be isolated as a pure culture from AFB-  
65 diseased larval cadavers, while other microbial competitors are absent in the degradation  
66 process of the infected larvae<sup>24</sup>.

67 Paenilamicin is a linear, cationic aminopolyol peptide antibiotic and is synthesized via an  
68 unusual nonribosomal peptide synthetase-polyketide synthase (NRPS-PKS) hybrid assembly  
69 line that exhibits several fascinating biosynthetic features. It contains unusual structural motifs  
70 such as galantinamic acid (Glm), agmatinamic acid (Aga), *N*-methyldiaminopropionic acid  
71 (mDap), galantinic acid (Gla) and a 4,3-spermidine (Spd) at the C-terminus (**Figure 1**).  
72 *P. larvae* produces a mixture of paenilamicin variants A1, A2, B1 and B2. They only differ in

73 two positions of the paenilamicin backbone: at the N-terminus and in the center between  
 74 mDap1 and Gla. Either a lysine (series A) or an arginine (series B) is activated by the  
 75 adenylation domain of NRPS1 (**Figure 1**). The amino acid residue between mDap1 and Gla is  
 76 a lysine (series 1) or an ornithine (series 2) assigned to be incorporated by NRPS4 (*pamD*),  
 77 respectively (**Figure 1**).

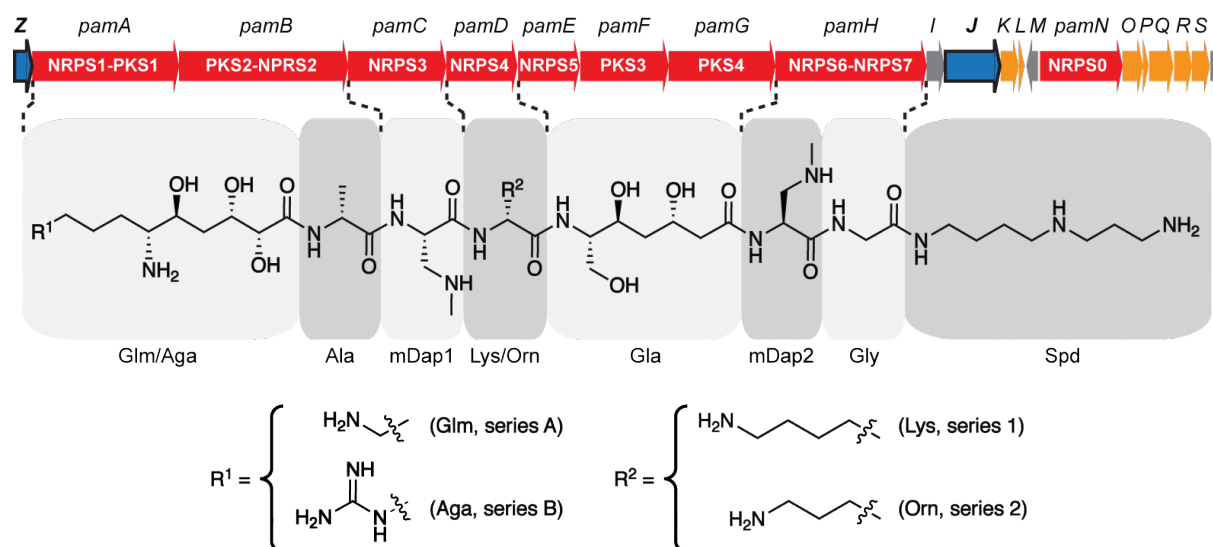

78  
 79 **Figure 1. Biosynthetic gene cluster and structure of paenilamicin variants.** The *pam* gene cluster<sup>22</sup>  
 80 contains core biosynthetic (red), auxiliary biosynthetic (orange), resistance (*pamZ* and *pamJ*; blue) and  
 81 other (grey) genes and expresses the NRPS-PKS hybrid biosynthetic machinery for the production of  
 82 paenilamicin A1 (Glm, Lys), A2 (Glm, Orn), B1 (Aga, Lys) and B2 (Aga, Orn). Abbreviations are listed  
 83 as follows: galantinamic acid (Glm), agmatinamic acid (Aga), lysine (Lys), ornithine (Orn), alanine (Ala),  
 84 *N*-methylidiaminopropionic acid (mDap), galantinic acid (Gla), glycine (Gly), 4,3-spermidine (Spd).

85 The *pam* gene cluster harbors a gene encoding the putative acetyl-CoA-dependent *N*-  
 86 acetyltransferase, PamZ, which belongs to the Gcn5-related *N*-acetyltransferase (GNAT)  
 87 superfamily<sup>25,26</sup>. One prominent member of this superfamily is the bacterial aminoglycoside *N*-  
 88 acetyltransferase (AAC) that plays an important role in antibiotic resistances, particularly in  
 89 clinical and environmental settings<sup>27</sup>. Aminoglycoside antibiotics have been widely used in the  
 90 treatment of bacterial infections but they rapidly lose activity against multi-resistant bacteria  
 91 due to adaptation and the development of resistance. By contrast, self-resistance is an innate,  
 92 non-adaptation-based mechanism for the protection against self-produced antimicrobial  
 93 agents. Since self-produced antimicrobial agents could also harm the bacterial host, self-  
 94 resistance is critical for survival and territorial competition.

95 Our results demonstrate the deactivation of paenilamicins by the regio- and stereoselective  
 96 self-resistance protein PamZ including its high-resolution crystal structure that shows how its  
 97 tandem-domain arrangement organizes substrate binding. Together with a parallel study<sup>28</sup>, in  
 98 which we report on the total synthesis and the biological evaluation of paenilamicin, we have

99 here unambiguously identified the N-terminal building block of paenilamicins as an essential  
100 switch for target binding, biological activity and self-resistance.

## 101 Results

### 102 Regio- and stereoselective *N*-acetylation of paenilamicin by PamZ

103 To confirm our hypothesis that PamZ (NCBI accession no.: WP\_023484187) is an acetyl-CoA-  
104 dependent *N*-acetyltransferase that targets paenilamicins, we monitored PamZ-mediated  
105 antibacterial effects *in vitro* by agar diffusion assays against *Bacillus megaterium*  
106 (*B. megaterium*) as indicator strain as well as by mass spectrometry (MS) and nuclear  
107 magnetic resonance (NMR) spectroscopy. To this end, the *pamZ* gene was amplified from the  
108 wild type (WT) *P. larvae* ERIC II strain, inserted into the commercial pET28a(+) vector and  
109 transformed into *E. coli* BL21-Gold(DE3) for heterologous expression. PamZ was then purified  
110 (**Figure S1**) and used for the assays including four native paenilamicin variants as substrates  
111 and acetyl-CoA as co-substrate. The paenilamicin variants were purified from *P. larvae* ERIC I  
112 and ERIC II, which preferably produce the paenilamicin mixtures A2/B2 and A1/B1,  
113 respectively (**Figure 1, Figure S2**). In addition, we also tested synthetic paenilamicin B2  
114 (PamB2\_3)<sup>28</sup>.

115 The agar diffusion assays clearly showed that paenilamicins incubated with PamZ and  
116 acetyl-CoA were not able to inhibit the growth of *B. megaterium*, whereas antibacterial activity  
117 was observed in the absence of acetyl-CoA and/or PamZ (**Figure 2**). This loss of biological  
118 activity correlated with the conversion of paenilamicins to the corresponding *N*-  
119 acetylpaenilamicins as observed by HPLC-ESI MS. ESI mass spectra revealed that the mass-  
120 to-charge ratios of natural and synthetic paenilamicins exhibited a characteristic mass shift of  
121 42 Da indicative of the addition of an acetyl group (**Figure S3-S7**).

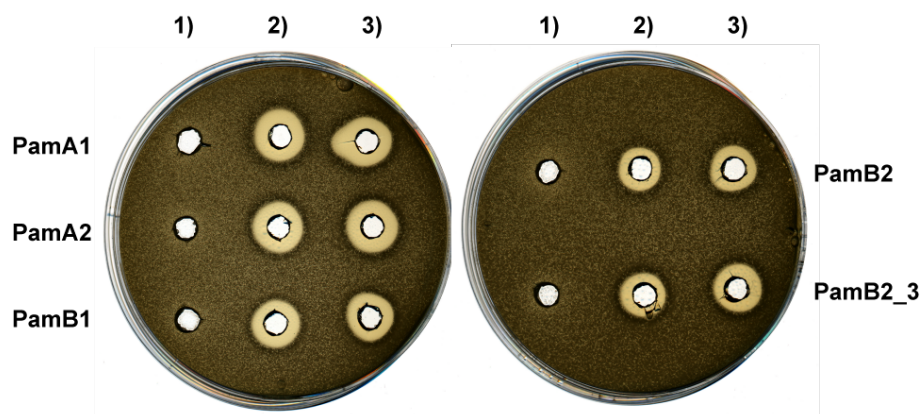

122  
123 **Figure 2. Deactivation of paenilamicins through PamZ-mediated *N*-acetylation tested by agar**  
124 **diffusion assay against *B. megaterium* as indicator strain.** Paenilamicin variants (PamA1, A2, B1,  
125 B2) isolated from *P. larvae* and synthetic paenilamicin B2 (PamB2\_3) were incubated *in vitro* with both  
126 acetyl-CoA and PamZ (1), acetyl-CoA only (2) or PamZ only (3). Samples 2 and 3 are negative controls  
127 and indicate the lack of bacterial growth.

128 Paenilamicin contains several primary and secondary amino groups that are potential  
 129 candidates for *N*-acetylation. To determine the site of acetylation, we monitored PamZ-  
 130 mediated effects in fingerprint tandem MS and NMR spectra of paenilamicin before and after  
 131 treatment with PamZ/acetyl-CoA. Besides the mass shift of 42 Da for the acetylation,  
 132 characteristic MS<sup>2</sup> fragmentation patterns originated from the difference between Gln and Aga  
 133 residues in series A and B (+28 Da) as well as the difference between Lys and Orn residues  
 134 in series 1 and 2 (+14 Da). MS<sup>2</sup> fragmentation mainly resulted in fragment ions b<sub>4</sub>, y<sub>4</sub> and y<sub>6</sub> of  
 135 each paenilamicin and *N*-acetylpaenilamicin variant acquired by collision-induced dissociation  
 136 (**Table S1**). Fragment ion b<sub>4</sub> varied depending on the paenilamicin series showing mass shifts  
 137 of 14 Da and 28 Da. Importantly, we observed a mass shift of 42 Da only for fragment ion b<sub>4</sub>,  
 138 indicating acetylation in the N-terminal half of paenilamicin. By contrast, the fragment ions y<sub>4</sub>  
 139 and y<sub>6</sub> did not exhibit any mass shifts of 42 Da between paenilamicins and *N*-  
 140 acetylpaenilamicins. Thus, we excluded acetylation in the C-terminal half of paenilamicin  
 141 (**Figure S8-S18**). In addition, we detected and isolated small amounts of *N*-acetylpaenilamicin  
 142 A1, B1 and B2 from supernatants of *P. larvae* ERIC I and ERIC II (**Figure S19**), and compared  
 143 them with our products formed *in vitro*. The MS<sup>2</sup> fragmentation analysis confirmed that the  
 144 mono-acetylation in the N-terminal half of paenilamicin also occurred *in vivo* (**Figure S20-S22**).  
 145 The MS<sup>2</sup> experiments did not reveal whether the N-terminal amino group of Aga-6 or its side  
 146 chain (amino/guanidino group) was acetylated.

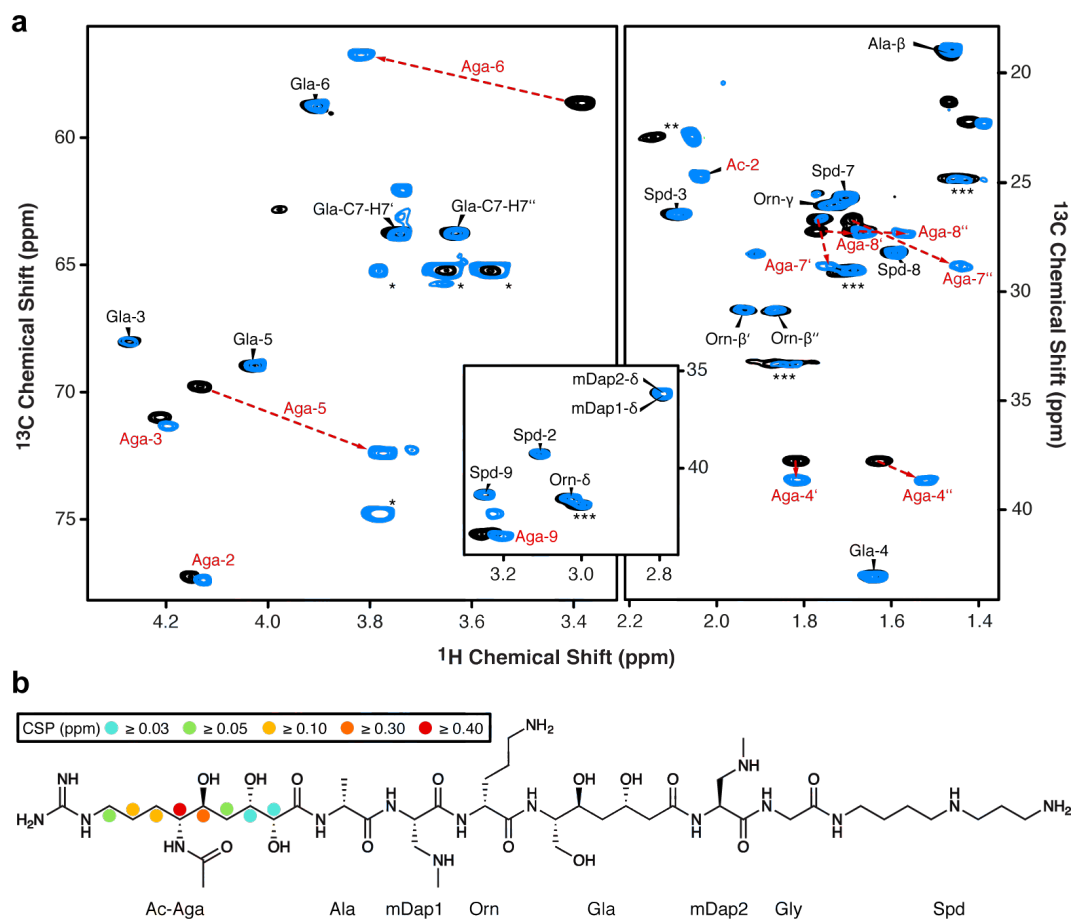

148 **Figure 3. Identification of the *N*-acetylation site through 2D NMR spectroscopy.** **a** Overlay of  
149 relevant  $^1\text{H}$ - $^{13}\text{C}$  HSQC sections of paenilamicin B2 (black) and *N*-acetylpaenilamicin B2 (blue). Strongly-  
150 perturbed cross-peaks are highlighted with red labels. Known impurities are labeled with one, two and  
151 three asterisks arising from glycerol, acetic acid and residual purification traces of paenilamicin B1,  
152 respectively. **b** Significant chemical shift perturbations (CSPs) are indicated as circles (see legend for  
153 color code) in the chemical structure of *N*-acetylpaenilamicin B2.

154 To ultimately identify the functional group that is modified by PamZ, we acquired  $^1\text{H}$ - $^{13}\text{C}$   
155 hetero-nuclear single-quantum coherence (HSQC) NMR spectra of paenilamicin B2 before  
156 and after incubation with PamZ/acetyl-CoA. Although both spectra were mostly  
157 superimposable, severe chemical shift perturbations (CSPs) were observed for a minor  
158 fraction of cross-peaks (**Figure 3a**). Mapping CSPs onto the structure of paenilamicin B2  
159 revealed a well-defined region comprising the N-terminal half, with the strongest effect being  
160 located at Aga-6 (**Figure 3b, Table S2**). *N*-acetylpaenilamicin B2 also showed an additional  
161 cross-peak compared to paenilamicin B2, which we tentatively assigned to the methyl moiety  
162 of the newly attached acetyl group (**Figure 3a**). Our data unequivocally demonstrated that  
163 PamZ mono-*N*-acetylates the N-terminal amino group at Aga-6 position of paenilamicin and  
164 thereby abolishes its antibacterial activity. Ultimately, this result is further supported by two  
165 synthetic diastereomers of paenilamicin B2 with L- instead of the native D-configuration at Aga-  
166 6 (PamB2\_1 and PamB2\_2), that were both antibacterially less active<sup>28</sup> and that were not  
167 modified by PamZ (**Figure 4, Figure S23**).

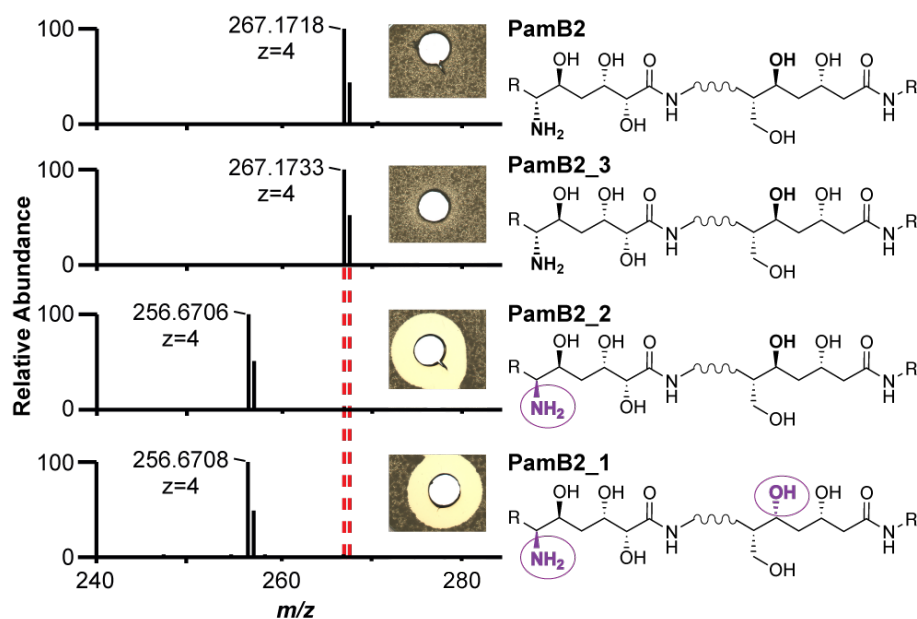

168  
169 **Figure 4. Substrate specificity and stereoselectivity of PamZ.** The natural product (PamB2),  
170 synthetic paenilamicin B2 (PamB2\_3) and synthetic diastereomers of paenilamicin B2 (PamB2\_2,  
171 PamB2\_1) were incubated with PamZ and acetyl-CoA *in vitro* and tested in an agar diffusion assay  
172 against *Bacillus megaterium* (insets). Each single reaction was verified by HPLC-ESI MS. Dashed lines

173 indicate the mass shift of 42 Da (4x 10.5 Da) due to *N*-acetylation. Changes in stereoconfiguration are  
174 highlighted in purple and circles.

### 175 **The structure of PamZ:acetyl-CoA binary complex**

176 A BLAST<sup>29</sup> search indicated that PamZ belongs to the GNAT superfamily with a sequence  
177 identity of 31% to the *N*-acetyltransferase, ZmaR, whose structure has not yet been  
178 determined and which confers resistance against the aminopolyol peptide antibiotic,  
179 zwittermicin A, in *Bacillus cereus* UW85 (**Figure S24**)<sup>30</sup>. We elucidated the crystal structure of  
180 PamZ in complex with acetyl-CoA at a resolution of 1.34 Å by using the uncharacterized *N*-  
181 acetyltransferase from *Streptococcus suis* 89/1591 (PDB-ID: 3g3s) for molecular replacement  
182 (**Table S3**). The electron density was of excellent quality, allowed the modeling of the entire  
183 poly-peptide chain and unambiguously revealed the bound acetyl-CoA (**Figure S25**). PamZ  
184 comprises an N-terminal domain (NTD, residues 1-128, secondary structure elements  
185 indicated by primes) and a C-terminal domain (CTD, residues 140-275) which both adopt the  
186 characteristic GNAT fold (**Figure 5a**)<sup>31</sup>. The two tandem-GNAT domains, that may have  
187 originated from a gene duplication event, share low sequence identity (< 20%) and are  
188 connected by an  $\alpha$ -helical linker ( $\alpha_{\text{bridge}}$ , residues 129-139). The overall fold of each domain is  
189 very similar to that of bacterial aminoglycoside *N*-acetyltransferases (AACs), as pairwise  
190 structural alignments with several AACs (PDB-IDs: 1bo4, 1m4i, 1s3z) gave root-mean square  
191 deviations (RMSDs) of 2.9-4.2 Å for both the NTD and CTD (**Figure S26**)<sup>32</sup>. A structural  
192 superimposition between the NTD and CTD of PamZ yielded an RMSD of 4.2 Å for 75 pairs of  
193 C $\alpha$  atoms (**Figure S27**)<sup>32</sup>.

194 However, a comparison with the typical GNAT fold revealed several unique features in  
195 PamZ. Instead of two N-terminal  $\alpha$ -helices,  $\alpha 1$  and  $\alpha 2$ , both domains of PamZ contain three  
196 short helical segments,  $\alpha 0$ - $\alpha 1$ - $\alpha 2$ , which pack onto one face of the central antiparallel  $\beta$ -sheet,  
197  $\beta 2$ - $\beta 3$ - $\beta 4$ , whereas helix  $\alpha 3$  buries its other side. A kink in the backbone conformation of strand  
198  $\beta 3$ , involving residues T199 and C200, causes a strong right twist and thus a distortion of the  
199 antiparallel  $\beta 3$ - $\beta 4$  arrangement, which led us to discriminate these strands as  $\beta 3a/\beta 3b$  and  
200  $\beta 4a/\beta 4b$  (**Figure 5a**). The central  $\beta$ -sheet is extended by strand  $\beta 5'$  in the NTD, whereas the  
201 CTD shows the characteristic  $\beta$ -bulge of GNAT enzymes – a V-shaped cavity between strands  
202  $\beta 4b$  and  $\beta 5$  accommodates the pantetheine segment of CoA (**Figure 6a**). Furthermore, the  
203 well-conserved pyrophosphate-binding loop (P-loop) of the GNAT family (R/Q-X-X-G-X-A/G)<sup>25</sup>  
204 is only present in the CTD of PamZ (Q-N-K-G-L-A) between strand  $\beta 4b$  and helix  $\alpha 3$   
205 (**Figure 6a**)<sup>33</sup>, whereas the NTD is missing this signature motif. Accordingly, there is only one  
206 acetyl-CoA molecule canonically bound in the PamZ structure, namely to the CTD.

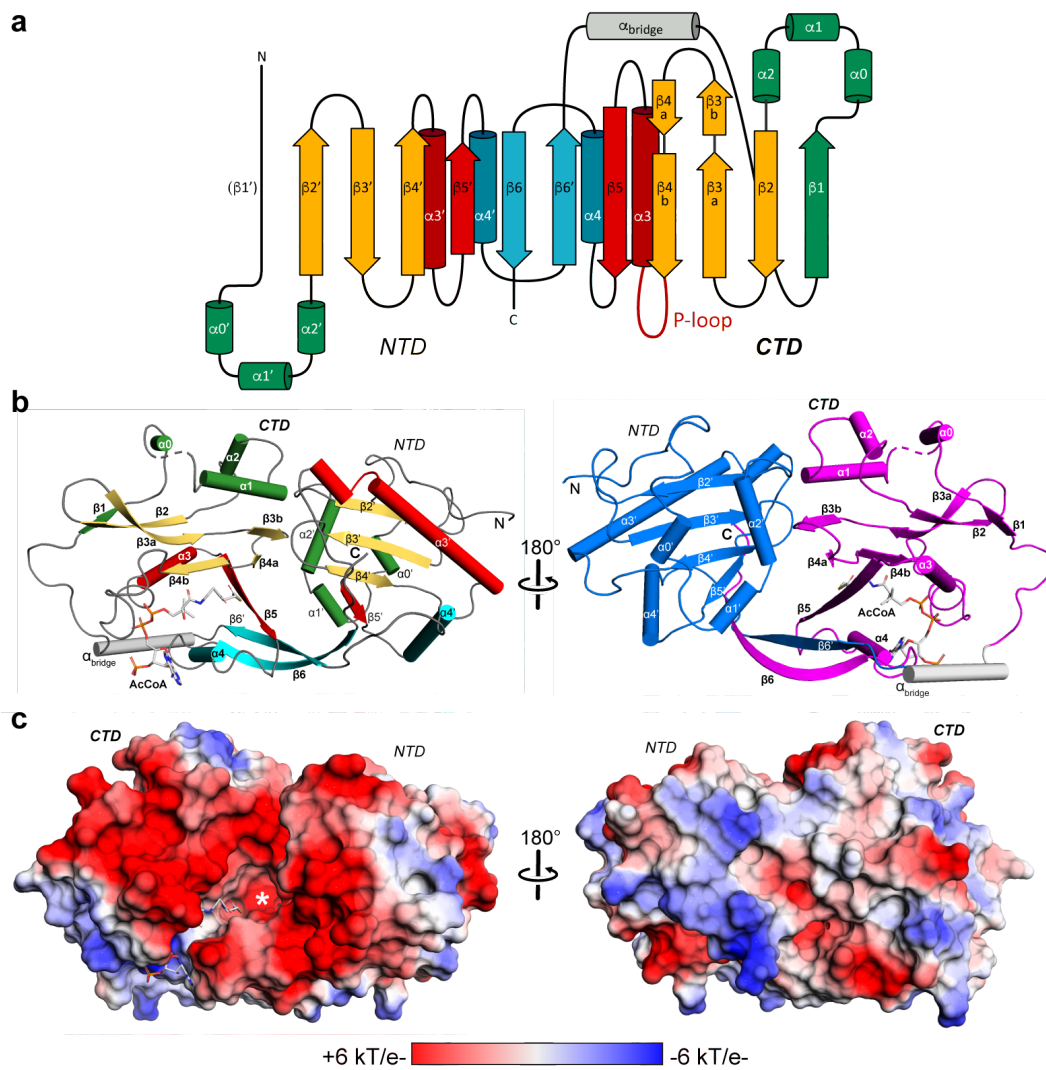

207

208 **Figure 5. X-ray crystal structure of Gcn5-related N-acetyltransferase PamZ.** **a** Structural topology  
 209 of PamZ with its characteristic tandem-GNAT fold. The protein structure is divided into an N-terminal  
 210 (NTD) and a C-terminal (CTD) domain. Color coding of protein regions follows that of other bacterial  
 211 GNATs, such as aminoglycoside N-acetyltransferases (AACs)<sup>31</sup>. **b** Cartoon representations of PamZ  
 212 from two perspectives. The first perspective (*left*) follows the color code as in a). Acetyl-CoA (AcCoA)  
 213 bound to the P-loop and  $\beta$ -bulge of the CTD is depicted as sticks. The  $\beta$ -bulge is formed by strands  $\beta$ 4b  
 214 and  $\beta$ 5. The tandem-GNAT domains are highlighted (*right*) in blue (NTD) and purple (CTD). Secondary  
 215 structure elements are labeled according to the protein topology. **c** Identical view as in panel b) with the  
 216 electrostatic potential mapped on the surface of PamZ, illustrating positive (blue) and negative (red)  
 217 charges. The acetyl group attached to CoA (sticks) points into the active site highlighted by an asterisk.

218 Hence, we concluded that the NTD is incompetent of binding acetyl-CoA and rather plays  
 219 a structural role, in particular for substrate binding (see below). Notably, many GNAT enzymes  
 220 exist as homodimers in solution with various arrangements of the monomer-monomer  
 221 interface<sup>31</sup>. Likewise, AACs have often been crystallographically observed in a homodimeric  
 222 state, although their quaternary structure in solution may vary<sup>34</sup>. PamZ exists as a monomer,  
 223 both in solution and in the crystal (**Figure S28**). However, the tandem-GNAT domain



224 constellation of PamZ achieves an intramolecular domain-domain interface that resembles that  
225 of some GNAT homodimers. There are several GNAT enzymes that utilize domain swapping  
226 of strand  $\beta 6$  to stabilize their homodimeric structure<sup>33,35,36</sup>. Interestingly, a major interface in  
227 PamZ is achieved by domain-swapping of strand  $\beta 6$  ( $\beta 6'$ ), which inserts between strands  $\beta 5'$   
228 and  $\beta 6'$  ( $\beta 5$  and  $\beta 6$ ) of the opposing domain and thus forms an extended, antiparallel and  
229 strongly-twisted  $\beta$ -sheet throughout the enzyme (**Figure 5b**). This  $\beta$ -sheet is only interrupted  
230 by the  $\beta$ -bulge in the CTD accommodating the cofactor and allowing the amide groups of its  
231 pantetheine portion to form pseudo- $\beta$ -sheet hydrogen-bonds to strand  $\beta 4b$  (**Figure 6a**). A very  
232 similar tandem arrangement of a pseudo-GNAT NTD and a canonical GNAT CTD can be found  
233 in the template protein (PDB-ID: 3g3s). Another example is the structure of mycothiol synthase  
234 MshD from *Mycobacterium tuberculosis*, which is also organized as a tandem repeat of two  
235 GNAT domains with a catalytically inactive NTD<sup>37</sup>.

236 PamZ appears to utilize its NTD to form a well-defined substrate pocket with strands  $\beta 5$  and  
237  $\beta 6'$  representing its floor. A second interface between the NTD and CTD is accomplished  
238 through tight packing of helix  $\alpha 2'$  onto the small  $\beta 3b$ - $\beta 4a$  sheet. Further interactions involve  
239 helix  $\alpha 2$  of the CTD and the loops between  $\alpha 2'$  and  $\beta 2'$  as well as  $\beta 3'$  and  $\beta 4'$  of the NTD.  
240 These inter-domain contacts fully cover the central groove that is normally found at the  
241 interface of homodimeric structures of GNAT enzymes and restrict substrate entry to the  
242 opening that is also used by the cofactor. This remaining cleft between the two domains of  
243 PamZ is decorated with several acidic residues (e.g. E89, E116, E118, D120, D162, D170,  
244 D215, E216, E217, E218, E272, E274 and the C-terminus) and thus deploys a large  
245 negatively-charged surface to attract its polycationic substrate (**Figure 5c**). A corridor that lies  
246 aside and beyond the acetyl group of the cofactor is approximately 7-8 Å deep and 8-9 Å wide  
247 with respect to the thioester carbonyl atom. Although we did not obtain crystals of a ternary  
248 PamZ-acetyl-CoA-paenilamicin complex, the position of acetyl-CoA, the well-defined shape of  
249 the neighboring pocket and our knowledge about the substrate's N-terminal acetylation site  
250 allows us to predict that the Glm/Aga side-chain of paenilamicin very likely penetrates into this  
251 pocket. Acidic residues D25 (loop between  $\alpha 1'$  and  $\alpha 2'$ ), E122 ( $\beta 6'$ ), and E208 ( $\beta 4a$ ) are well-  
252 positioned within the pocket to accommodate and stabilize the guanidine group of Aga, as well  
253 as to tolerate the  $N\zeta$  amine of Glm. Other residues that shape the substrate pocket include  
254 T58/T59 (loop between  $\beta 3'$  and  $\beta 4'$ ), T98 ( $\beta 5'$ ) and Y124 ( $\beta 6'$ ) of the NTD as well as C200/Y201  
255 ( $\beta 3b$ ) and S245/F247 ( $\beta 5$ ) of the CTD (**Figure 6c**). This shows that both domains most likely  
256 contribute to substrate recognition. Moreover, the structure of PamZ explains its  
257 regioselectivity: if PamZ was to modify e.g. the terminal amino group of spermidine in  
258 paenilamicin, the enzyme would not require such a deep substrate-binding pocket. The  
259 architecture of the central groove between the NTD and CTD has evolved to optimally

260 accommodate the N-terminal Glm/Aga building block of paenilamicin, whilst terminal amines  
261 such as those of spermidine, ornithine and lysine side-chains would not occupy this binding  
262 pocket, as they would experience significantly less binding stabilization.

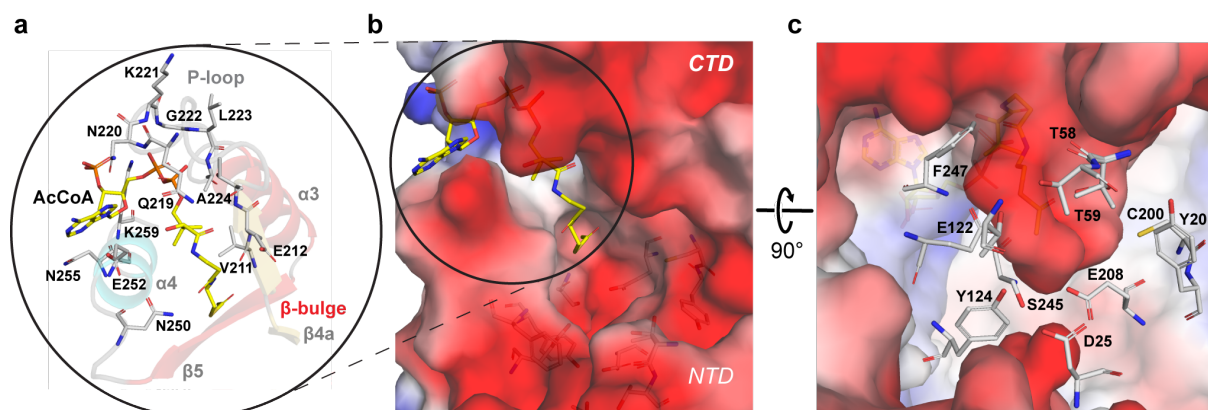

263  
264 **Figure 6. Active site of PamZ.** **a** Motifs A ( $\beta 4$ - $\alpha 3$ ) and B ( $\beta 5$ - $\alpha 4$ ) located in the C-terminal domain  
265 (CTD) interact with co-substrate acetyl-CoA. **b** Close-up view of the active site displaying the negatively  
266 charged groove (color code as in **Figure 5c**). **c** Highlighted amino acid residues with hydrogen-donating  
267 and -accepting groups form the groove and interact with the substrate paenilamicin.

268 Such accommodation of Glm/Aga in the substrate pocket would position the N-terminal  
269 amino group of Aga-6 close to the thioester carbonyl of the cofactor. An active-site aspartate  
270 or glutamate residue commonly acts as a general base to trigger the *N*-acetylation reaction by  
271 deprotonation of the amine followed by a nucleophilic attack at the carbonyl of the thioester<sup>34</sup>.  
272 In PamZ, the side-chains of E122 ( $\beta 6'$ ) as well as E208 ( $\beta 4a$ ) exhibit an interatomic distance  
273 of approximately 7 Å to the carbonyl atom of acetyl-CoA and thus might be in close proximity  
274 to the N-terminal amino group of Aga-6 (**Figure 6c**). Residue S245 ( $\beta 5$ ) is sandwiched between  
275 E122 and E208, and may mediate deprotonation and/or proton shuttling. Furthermore, we  
276 cannot exclude the involvement of water molecules during proton transfer. An oxyanion hole  
277 as described for myristoyl-CoA transferase<sup>38</sup> is not present in PamZ, but the amide proton of  
278 V211 ( $\beta 4b$ ) facilitates hydrogen-bonding to the carbonyl oxygen of the thioester, which would  
279 increase the electrophilicity of the carbonyl carbon and stabilize the tetrahedral transition state  
280 after nucleophilic attack.

### 281 Self-resistance mechanism of *P. larvae*

282 The deactivation of paenilamicin through formation of *N*-acetylpaenilamicin by the action of  
283 PamZ (**Figure S3-S7**) implicates that the enzyme may confer self-resistance to the producer  
284 strain *P. larvae*. To test this hypothesis, we exposed the deletion mutant *P. larvae*  $\Delta pamZ$  to a  
285 mixture of paenilamicin A1/B1 in an agar diffusion assay. The mixture, which was purified from  
286 *P. larvae* ERIC II, inhibited bacterial growth of the deletion mutant  $\Delta pamZ$ , but not that of the  
287 WT strain (**Figure 7a**).

288 This result demonstrated that *P. larvae* requires the resistance gene, *pamZ*, to protect itself  
289 from the deleterious effects of its own antibacterial agent, paenilamicin. For further  
290 experimental support, we analyzed supernatants and cell pellets of *P. larvae* WT and  $\Delta$ *pamZ*  
291 for paenilamicins and *N*-acetylpaenilamicins. In cell lysates of *P. larvae* WT, we exclusively  
292 found *N*-acetylpaenilamicin, whereas for the deletion mutant  $\Delta$ *pamZ* only unmodified  
293 paenilamicin (**Figure 7b**) was detected. From paenilamicin isolates of the WT strain, primarily  
294 paenilamicin and only small amounts of *N*-acetylpaenilamicin were found in the supernatant  
295 by HPLC-ESI MS (**Figure S2**). These findings demonstrate that the self-resistance factor  
296 PamZ enables *P. larvae* WT to acetylate and thus inactivate intracellular paenilamicin.

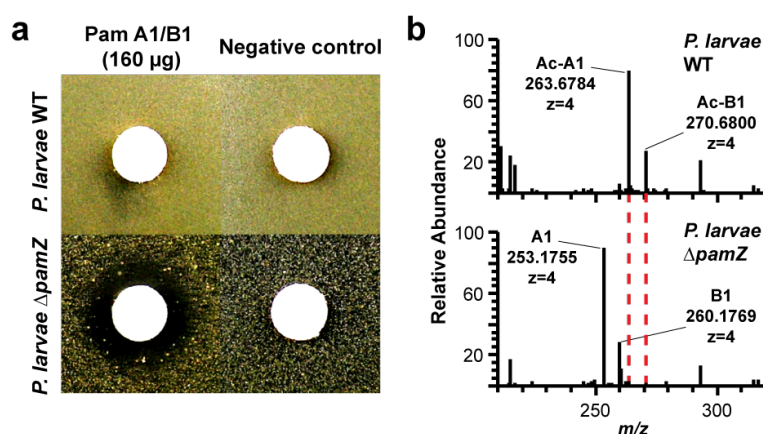

297  
298 **Figure 7. Self-resistance of *P. larvae* against paenilamicin.** a Deactivation of a paenilamicin mixture  
299 A1/B1 (left) was tested by an agar diffusion assay against *P. larvae* WT (top) and *P. larvae*  $\Delta$ *pamZ*  
300 (bottom). The negative control (right) contained water only. b HPLC-ESI MS spectra of cell lysates of  
301 *P. larvae* WT (top) and *P. larvae*  $\Delta$ *pamZ* (bottom) are depicted. Relevant peaks for paenilamicin (A1/B1)  
302 and *N*-acetylpaenilamicin (Ac-A1/Ac-B1) species are labeled with corresponding *m/z* ratios (*z*=4).

303 *N*-acetylation functions as an efficient self-protection mechanism by scavenging  
304 paenilamicin that reenters the cells of *P. larvae*. However, this mechanism may not apply to  
305 intracellular paenilamicin after its release from the NRPS-PKS assembly line. Instead, it seems  
306 very likely that an inactive precursor, *i.e.* a prodrug, of paenilamicin is produced to mask the  
307 strong antibacterial activity before cellular export. Along these lines, the biosynthetic gene  
308 cluster of paenilamicin<sup>22</sup> harbors the *pamJ* gene, which shows significant sequence similarity  
309 to a cyclic-peptide export ABC transporter with D-asparagine-specific peptidase activity that  
310 has been reported to be involved in a prodrug resistance mechanism in nonribosomal peptide  
311 synthesis<sup>39-42</sup>. The peptidase recognizes and cleaves an *N*-acyl-D-asparagine unit of the  
312 prodrug. Accordingly, *P. larvae* must have developed a dual self-resistance mechanism  
313 against paenilamicin both potentially addressing the N-terminal Gln/Aga region, specifically  
314 the N-terminal amino group at Aga-6 position, as modification site. Not only *P. larvae*, but also  
315 other bacteria belonging to the Firmicutes refer to a dual self-resistance mechanism associated  
316 with NRPS-PKS-derived compounds like amicoumacin<sup>41,43</sup>, zwittermicin<sup>30</sup> and edeine<sup>44</sup>

317 **(Figure S29)**. In a very recent study, paenilamicin B2 showed an inhibitory effect (IC<sub>50</sub> of  
318 approx. 0.3 μM) on the *E. coli* ribosome *in vitro*, whereas the diastereomer PamB2\_2 was  
319 approx. 10-fold and the *N*-acetylpaenilamicin B2 approx. 100-fold less active<sup>28</sup>. The  
320 modifications of the N-terminal amino group at Aga-6 thus point to the importance of the N-  
321 terminal Glm/Aga region as major pharmacophore mediating recognition at the molecular  
322 target.

323 The insights into the pharmacophore region of paenilamicins and the structure of PamZ  
324 including its substrate-binding pocket may lead to the development of inhibitors against the  
325 self-resistance factor to weaken the bee larvae pathogen. In summary, these results expand  
326 our knowledge of the molecular strategies exploited by *P. larvae* to survive in its ecological  
327 niche – knowledge that is needed to combat this pathogen and secure health of bee colonies  
328 worldwide.

## 329 **Methods**

### 330 **Bacterial strains and culture conditions**

331 The field strain *Paenibacillus larvae* (*P. larvae*) 04-309 (DSM 25430) and the deletion mutant  
332 04-309  $\Delta pamZ$  were cultivated as follows: bacteria were grown on Columbia sheep blood agar  
333 (CSA, Thermo Fisher Scientific Oxoid, Schwerte, Germany) medium plates at 37°C for 2-  
334 3 days. A preculture of 2 mL Mueller-Hinton-yeast-phosphate-glucose-pyruvate (MYPGP)<sup>45</sup>  
335 medium was inoculated with a single colony and grown overnight. A 50 mL culture of MYPGP  
336 broth was inoculated with the preculture to reach an optical density measured at 600 nm  
337 (OD<sub>600</sub>) of 0.001. This main culture was incubated at 30°C for 72 h with gentle shaking (80 rpm).  
338 Cultures were centrifuged at 3200 g, 4°C for 30 min and supernatants were stored at -20°C  
339 until further use. *Escherichia coli* (*E. coli*) BL21-Gold(DE3) cells were cultivated in Luria-Bertani  
340 (LB) medium at 37°C and 180 rpm. The medium was supplemented with kanamycin (50 µg mL<sup>-1</sup>)  
341 as antibiotic based on the selection marker of the plasmid after transformation. Indicator  
342 strains like *B. megaterium* used for the agar diffusion assay were cultivated in LB medium at  
343 37°C and 180 rpm.

### 344 **Deletion mutant generation**

345 The generation of the *pamZ* deletion mutant was realized through a well-established protocol  
346 for *P. larvae* using the TargeTron Gene Knockout System (Sigma-Aldrich, Germany) based on  
347 group II intron insertion as previously described<sup>10,13,14,23,46</sup>. The *pamZ* gene of *P. larvae*  
348 DSM 25430 (GenBank: CP003355.1, range from 1729003 to 1729830) was disrupted via site-  
349 specific insertion of a 900 bp-sized bacterial mobile group II intron LI.LtrB from *Lactococcus*  
350 *lactis* at position 118 from the start codon. The intron was previously modified to enable specific  
351 insertion at this site identified by a computer algorithm provided by the manufacturer  
352 (<http://www.sigma-genosys.com/targetron>) with primers also identified by the computer  
353 algorithm (**Table S4**). After successful cloning and transformation into *P. larvae* DSM 25430,  
354 screening for *P. larvae* DSM 25430 deletion mutants with the intron integrated in the *pamZ*  
355 gene was done via PCR with *pamZ*-specific primers (**Table S4, Figure S30a**). Growth of the  
356 *pamZ* deletion mutant in liquid MYPGP medium was not significantly altered in comparison to  
357 the wild type strain (**Figure S30b**, two-way-ANOVA,  $p=0.6486$ ). In brief, growth curves were  
358 obtained as follows. *P. larvae* starting cultures had an optical density at 600 nm (OD<sub>600</sub>) of  
359 0.001 and were covered with mineral oil for anaerobic conditions. Cultures were grown in a  
360 96-well-plate (Greiner Bio-One GmbH, Frickenhausen, Germany) and incubated at 37°C while  
361 shaking in a Synergy HT plate reader (BioTek, Bad Friedrichshall, Germany). Measurements  
362 of the OD<sub>600</sub> took place hourly for 48 h. The experiment was repeated three times with three  
363 biological replicates with three technical replicates each. Representative results are shown.

### 364 **Genomic DNA isolation**

365 Cells of *P. larvae* were picked from CSA plates, resuspended in 50  $\mu$ L water and incubated at  
366 95°C for 10 min. They were centrifuged at 5000 g for 5 min and the supernatant containing the  
367 DNA was stored at -20°C until further use. For gene amplification for cloning procedures, pure  
368 DNA was isolated by using the MasterPure™ Gram Positive DNA Purification Kit (Epicentre,  
369 Illumina, San Diego, CA, USA) following the manufacturer's instructions.

### 370 **Plasmid construction and transformation**

371 Primers were designed for the amplification of the *pamZ* gene from *P. larvae* DSM 25430 and  
372 purchased from Thermo Fisher Scientific (**Table S5**). The gene *pamZ* was cloned into vector  
373 pET28a(+) introducing an N-terminal histidine-tag and a TEV site. Reactions were performed  
374 in the following conditions: initial denaturation at 95°C for 5 min, followed by 30 cycles (105 s  
375 per cycle) at 98°C for 30 s, at 61°C for 30 s, and at 72°C for 45 s, followed by a final extension  
376 step at 72°C for 10 min. The amplicons were purified and digested with *NheI* and *XhoI*, ligated  
377 with the digested pET28a(+) vector, and transformed into *E. coli* BL21-Gold(DE3).

### 378 **Heterologous expression and protein purification**

379 Terrific broth (TB) medium was inoculated with an overnight culture of pET28a\_pamZ  
380 transformed in *E. coli* BL21-Gold(DE3) cells to reach an OD<sub>600</sub> of 0.1 for the purification of  
381 PamZ. The culture was incubated at 37°C and 180 rpm until OD<sub>600</sub> of 0.8-1.0. Expression was  
382 induced by addition of 0.2 mM (f.c.) isopropyl  $\beta$ -D-1-thiogalactopyranoside (IPTG). Cells were  
383 further incubated at 160 rpm, 18°C for 20 h. Cells were harvested at 5000 g, 4°C for 30 min  
384 and the pellet was resuspended in lysis buffer (500 mM sodium chloride, 50 mM TRIS/HCL  
385 pH 8.0, 20 mM imidazole). Then, magnesium chloride, DNase, lysozyme and benzamidine  
386 were added into the solution. The cell disruption was performed by the cell homogenizer at  
387 15000 psi (Constant Systems Ltd, United Kingdom). Cell lysate was centrifuged at 50000 g,  
388 4°C for 30 min (Beckman Coulter, Avanti J-26 XP). Supernatant was loaded onto a His-Trap  
389 column using an ÄKTA protein purification system (GE Healthcare Life Sciences). The  
390 chromatography was run with a two-step gradient started with 100% starting buffer (500 mM  
391 sodium chloride, 50 mM TRIS/HCL pH 8.0, 20 mM imidazole) and switched to 50% elution  
392 buffer (500 mM sodium chloride, 50 mM TRIS/HCL pH 8.0, 250 mM imidazole) within 10 CV  
393 to elute the His<sub>6</sub>-tagged PamZ. A His-Trap crude FF column (GE Healthcare Life Sciences)  
394 was used for this purification. Fractions of interest were collected and combined to increase  
395 protein concentration. Subsequently, TEV protease (1 mg per 10 mg of protein) was added  
396 into the concentrated protein solution and incubated at 4°C for 16 h. The N-terminal, TEV-  
397 cleavable His<sub>6</sub>-tag was separated from the untagged PamZ by a second nickel affinity  
398 chromatography. A size exclusion chromatography was performed with a HiLoad 16/600  
399 Superdex 75 pg column (GE Healthcare Life Sciences) to remove residual imidazole from the  
400 protein sample with buffer solution (150 mM sodium chloride, 20 mM TRIS/HCL pH 8.0). The

401 flow rate was set to 1 mL min<sup>-1</sup>. Fractions of interest were collected again, verified by SDS-  
402 PAGE and Coomassie staining, and then concentrated. Protein samples were flash-frozen in  
403 liquid nitrogen and stored at -80°C for further applications.

#### 404 **Analytical size exclusion chromatography**

405 Mixture A and B were used as standards. Mixture A contained aprotinin (3 mg mL<sup>-1</sup>), carbonic  
406 anhydrase (3 mg mL<sup>-1</sup>), conalbumin (3 mg mL<sup>-1</sup>) and mixture B ribonuclease (3 mg mL<sup>-1</sup>),  
407 ovalbumin (4 mg mL<sup>-1</sup>). The chromatograms of mixture A and B were acquired as references  
408 to determine the oligomeric state of PamZ. Untagged PamZ (1.25 mg mL<sup>-1</sup>) was prepared to  
409 obtain the best fitted chromatogram. The size exclusion chromatography was run with the  
410 ÄKTA protein purification system (GE Healthcare Life Sciences), equipped with Superdex 75  
411 10/300 GL and run with buffer solution (150 mM sodium chloride, 20 mM TRIS/HCL pH 8.0).  
412 The flow rate was set to 0.5 mL min<sup>-1</sup>.

#### 413 **Protein crystallization, structure determination and refinement**

414 For crystallization experiments, PamZ was concentrated to 71 mg mL<sup>-1</sup>. Crystallization was  
415 performed in a sitting drop vapor diffusion setup at 293 K. The reservoir solution was composed  
416 of 40% (w/v) PEG 3350, 50 mM ammonium sulfate and 100 mM sodium acetate at pH 4.6.  
417 Prior to flash cooling, the crystals were cryo-protected in a reservoir solution supplemented  
418 with 20% (v/v) glycerol. Diffraction data were collected at beamline 14.2 at BESSY. Diffraction  
419 data were processed with XDS (**Table S3**)<sup>47</sup>. The structure was solved by molecular  
420 replacement with PHASER<sup>48</sup> using the N-terminal domain of the PDB-ID 3G3S. Since the C-  
421 terminal domain could not be readily placed the model was completed by Arp/wArp<sup>49</sup>. The  
422 structure was refined by maximum-likelihood restrained refinement in PHENIX<sup>50,51</sup>. Model  
423 building and water picking was performed with COOT<sup>52</sup>. Hydrogen atoms for protein residues  
424 and ligands were generated with PHENIX.REDUCE<sup>53</sup>. Model quality was evaluated with  
425 MolProbity and the JCSG validation server (JCSG Quality Control Check v3.1)<sup>54</sup>. Figures were  
426 prepared using PyMOL (Schroedinger Inc.). Electrostatic potentials were calculated with  
427 APBS<sup>55</sup>. Structural alignments have been performed using SSM<sup>32</sup>. Structural homologues  
428 were identified with the DALI server<sup>56</sup>. Structural interfaces were analyzed with the PISA  
429 server<sup>57,58</sup>.

#### 430 **Compound isolation (supernatant)**

431 1 L of frozen supernatants of *P. larvae* ATCC 9545 or DSM 25430 cultures were thawed and  
432 then incubated with Amberlite XAD16 adsorption beads (1 g of beads per 10 mL culture filtrate,  
433 Sigma, St. Louis, MO, USA) and stirred for 16 h at room temperature. Then, the flow through  
434 was separated from the beads and a three-step gradient elution applied using 1 L of 10% (v/v)  
435 methanol followed by 1 L each of 90% (v/v) methanol and 90% (v/v) methanol plus 0.1% formic

436 acid (f.c.) to finally obtain paenilamicin (and also *N*-acetylpaenilamicin). (*N*-  
437 acetyl)paenilamicin-containing fractions were concentrated and purified subsequently by using  
438 a Grace HPLC column (GROM-Sil 120 ODS-5-ST, 10  $\mu$ m, 250  $\times$  20 mm) coupled to an Agilent  
439 1100 HPLC system (Agilent Technologies, Waldbronn, Germany) with a MWD UV detector.  
440 The separation was accomplished by a linear gradient elution using water plus 0.1% (v/v)  
441 formic acid as solvent A and acetonitrile plus 0.1% (v/v) formic acid as solvent B. The gradient  
442 started from 3% (v/v) to 15% (v/v) solvent B for 8 min, followed by 100% (v/v) solvent B for  
443 7 min, and finished with an isocratic gradient of 100% (v/v) solvent B for 3 min. The flow rate  
444 was set to 20 mL min<sup>-1</sup>. In the next step, paenilamicin-containing fractions were concentrated,  
445 adjusted with trifluoroacetic acid to approximately pH 2.0 to increase separation and purified  
446 by an Agilent HPLC column (PLRP-S, 100  $\text{Å}$ , 10  $\mu$ m, 150  $\times$  25 mm) coupled to an Agilent 1100  
447 HPLC system with a MWD UV detector for the separation of the native (*N*-acetyl)paenilamicin  
448 variants. (*N*-acetyl)paenilamicin was purified by using an isocratic gradient elution using water  
449 plus 0.1% (v/v) trifluoroacetic acid as solvent A and acetonitrile plus 0.1% (v/v) trifluoroacetic  
450 acid as solvent B. The isocratic gradient was started with 1% (v/v) solvent B for 8 min, followed  
451 by a linear gradient from 1% (v/v) to 95% (v/v) solvent B for 7 min, and finished with an isocratic  
452 gradient of 95% (v/v) solvent B for 5 min. The flow rate was set to 20 mL min<sup>-1</sup>. (*N*-  
453 acetyl)paenilamicin-containing fractions were dried *in vacuo*, lyophilized to obtain pure  
454 compound and verified by HPLC-ESI-MS and <sup>1</sup>H-NMR spectroscopy.

#### 455 **Compound extraction (cell pellet)**

456 After cultivation of *P. larvae* DSM 25430 and its deletion mutant  $\Delta$ *pamZ*, the cells were  
457 harvested and the cell pellets resuspended in 50% methanol (1 g per 2 mL solvent). The cells  
458 were disrupted by sonication (Branson Sonifier 250) for five cycles (15 s each cycle). In  
459 between of each cycle, the cell lysate was incubated on ice for 60 s. The lysate was centrifuged  
460 at 5000 g, 15°C for 30 min. The supernatant was analyzed for *N*-acetylpaenilamicin and  
461 paenilamicin by HPLC-ESI MS.

#### 462 ***In vitro* activation assay**

463 A reaction mixture consisted of 0.5 mM paenilamicin, 7.5  $\mu$ M PamZ, 1 mM acetyl-CoA, 1.5 mM  
464 sodium phosphate buffer (pH 7.8). Also, samples were prepared each without enzyme and co-  
465 substrate as negative controls. The reaction mixture was incubated at 30°C for 8 h. PamZ was  
466 removed by Amicon centrifugal filters (Merck KGaA, Germany) using a 10 kDa molecular  
467 weight cut-off filter. Deactivation of paenilamicin was tested against *B. megaterium* as indicator  
468 strain by agar diffusion assay and analyzed with HPLC-ESI MS and NMR.

469 For the NMR experiment, excessive acetyl-CoA from the *in vitro* activation assay was  
470 removed by using an HPLC column (Phenomenex, Luna C18[2], 100  $\text{Å}$ , 5  $\mu$ m, 100  $\times$  4.6 mm)  
471 coupled to an Agilent 1100 HPLC system (Agilent Technologies, Waldbronn, Germany) with a



472 MWD UV detector. The separation was accomplished by a linear gradient elution using water  
473 plus 0.1% (v/v) formic acid as solvent A and acetonitrile plus 0.1% (v/v) formic acid as  
474 solvent B. The gradient started from 3% (v/v) to 15% (v/v) solvent B for 8 min, followed by  
475 100% (v/v) solvent B for 2 min, and finished with an isocratic gradient of 100% (v/v) solvent B  
476 for 2 min. The flow rate was set to 0.6 mL min<sup>-1</sup>.

477 For the determination of substrate specificity and stereoselectivity of PamZ including  
478 synthetic diastereomers, a reaction mixture consisted of 0.5 mM paenilamicin B2 (also for  
479 diastereomers), 7.5 μM PamZ, 1 mM acetyl-CoA, 1.5 mM sodium phosphate buffer (pH 7.8).  
480 Also, samples were prepared each without enzyme and co-substrate as negative controls. The  
481 reaction mixture was incubated at 30°C for 2 h. PamZ was removed by Amicon centrifugal  
482 filters (Merck KGaA, Germany) using a 10 kDa molecular weight cut-off filter. After removal of  
483 the protein, the reaction mixture was tested against *B. megaterium* as indicator strain by agar  
484 diffusion assay and analyzed with HPLC-ESI MS.

#### 485 **Agar diffusion assay**

486 20 mL of LB medium including 0.75% (w/v) agar was inoculated with bacterial suspension of  
487 *B. megaterium* with a final OD<sub>600</sub> of 0.05. After solidification of the agar plate, holes were  
488 punched into the agar for activity testing. 10 μL of each sample was pipetted into the holes  
489 after removal of PamZ and the plate incubated at 37°C overnight.

#### 490 ***In vivo* activation assay**

491 The growth of wild type *P. larvae* DSM 25430 was compared to the growth of *P. larvae*  
492 DSM 25430 Δ*pamZ* in the presence of purified paenilamicin A1/B1 from bacteria supernatants  
493 in an agar diffusion assay. In brief, pre-cultures with 5 mL volume were grown in MYPGP broth  
494 at 37°C while gently shaking overnight. Liquid lukewarm MYPGP agar was inoculated with  
495 *P. larvae* pre-cultures to result in a final optical density OD<sub>600</sub> of 0.05. Agar plates were poured  
496 and let harden. Meanwhile, 20 μL of paenilamicin A1/B1 dissolved in MilliQ (in total 160 μg per  
497 disk) were dispensed on filter disks and dried at room temperature. The dry filter disks were  
498 placed on the agar. The agar plates were incubated at 37°C overnight. Clear zones of inhibition  
499 around the filter disks were indicative of a loss of paenilamicin resistance.

#### 500 **Mass spectrometry analysis**

501 A 6530 Accurate-Mass Quadrupole Time-of-Flight (Q-TOF) LC/MS (Agilent Technologies,  
502 Waldbronn, Germany) was used to verify (*N*-acetyl)paenilamicin-containing fractions during the  
503 isolation and purification of paenilamicin. The Q-TOF was attached to an Agilent 1260 Infinity  
504 HPLC system and equipped with a HPLC column (Poroshell 120, EC-C8, 2.7 μm, 2.1 x 50 mm,  
505 Agilent Technologies, Waldbronn, Germany). The HPLC was started with a linear gradient  
506 from 5% (v/v) to 100% solvent B for 10 min using water plus 0.1% (v/v) formic acid as solvent A

507 and acetonitrile plus 0.1% (v/v) formic acid as solvent B, followed by an isocratic gradient of  
508 100% (v/v) for 1 min. The column was equilibrated with 5% (v/v) solvent B for 3 min. The flow  
509 rate was set to 0.5 mL min<sup>-1</sup>. Other parameters were set as follows: positive mode, gas  
510 temperature to 300°C, drying gas to 8 L min<sup>-1</sup>, nebulizer to 35 psi, sheath gas temperature to  
511 350°C, sheath gas flow to 11 L min<sup>-1</sup>, capillary voltage to 3500 V, fragmentor to 330 V, skimmer  
512 to 65 V, acquired rate to 1 spec s<sup>-1</sup>.

513 A LTQ-Orbitrap XL hybrid ion trap-orbitrap (Thermo Fisher Scientific GmbH, Bremen,  
514 Germany) was used to verify the *in vitro* activation assays and to generate tandem mass  
515 spectra of paenilamicin and *N*-acetylpaenilamicin in data-dependent acquisition (DDA) mode.  
516 The LTQ-Orbitrap XL was attached to an analytical HPLC 1200 Infinity system (Agilent  
517 Technologies, Waldbronn, Germany) and equipped with a HPLC column (Poroshell 120, EC-  
518 C18, 2.7 µm, 2.1 × 50 mm, Agilent Technologies, Waldbronn, Germany). HPLC was run with  
519 a linear gradient using water plus 0.1% (v/v) formic acid as solvent A and acetonitrile plus 0.1%  
520 (v/v) formic acid as solvent B from 5% (v/v) to 100% (v/v) solvent B for 6 min, followed by an  
521 isocratic gradient of 100% (v/v) solvent B for 2 min. The column was equilibrated with 5% (v/v)  
522 solvent B for 2 min. The flow rate was set to 0.5 mL min<sup>-1</sup>. The ESI source parameters were  
523 set as follows: product ion spectra were recorded in data-dependent acquisition (DDA) mode  
524 with a mass range from *m/z* 180 to *m/z* 2000 (MS1: FTMS, normal, 60000, full, positive. MS2:  
525 FTMS, normal, 30000). The parameter for the DDA mode was set as follows: dynamic  
526 exclusion (repeat count: 3, repeat duration: 30 s, exclusion size list: 50, exclusion  
527 duration: 180 s), current scan event (minimum signal threshold: 10000), activation (type: CID,  
528 default charge state: 2, isolation width: *m/z* 2.0, normalized collision energy: 35,  
529 activation Q: 0.25, activation time: 30 ms).

### 530 **Nuclear magnetic resonance spectroscopy**

531 NMR experiments were performed on a Bruker Avance III 700 MHz spectrometer equipped  
532 with a room-temperature TXI probe (Bruker, Karlsruhe, Germany). TopSpin 3.5 (Bruker,  
533 Karlsruhe, Germany) was used for data acquisition and processing. Spectra analysis was  
534 performed using NMRFAM-SPARKY<sup>59-61</sup>. <sup>1</sup>H and <sup>1</sup>H-<sup>13</sup>C HSQC spectra of paenilamicin and  
535 *N*-acetylpaenilamicin were recorded using samples in D<sub>2</sub>O with 0.1% acetic acid-d<sub>4</sub> at 298 K.  
536 <sup>1</sup>H-<sup>13</sup>C HSQC spectra were recorded with acquisition times of 120 ms and 9 ms in the direct  
537 <sup>1</sup>H and indirect <sup>13</sup>C dimension, respectively. A delay Δ/2 of 1.72 ms was used for INEPT  
538 transfers corresponding to <sup>1</sup>J<sub>HC</sub> of 145 Hz. Apodization of time domain data was performed  
539 using a squared sine-bell function shifted by 90°. The 2D data was processed by applying  
540 linear forward prediction in the indirect <sup>13</sup>C dimension and zero filling prior to Fourier  
541 transformation. <sup>1</sup>H chemical shifts were referenced externally using a sample of  
542 trimethylsilylpropanoic acid (TMSP-*d*<sub>4</sub>, Deutero GmbH, Kastellaun, Germany) in D<sub>2</sub>O with 0.1%  
543 acetic acid-d<sub>4</sub> measured at 298 K. <sup>13</sup>C chemical shifts were referenced indirectly using a

544 correction factor of  $f_{13C/1H} = 0.251449530^{62,63}$ . Chemical shift perturbations (CSPs) were  
545 calculated using the following equation<sup>64</sup>:

$$546 \quad CSP = \sqrt{(f \times \Delta\delta_{13C})^2 + (\Delta\delta_{1H})^2}$$

547 where  $\Delta\delta_{13C}$  and  $\Delta\delta_{1H}$  correspond to the <sup>13</sup>C and <sup>1</sup>H chemical shift differences between  
548 paenilamicin B2 and *N*-acetylpaenilamicin B2 for each carbon-proton pair. We used a  
549 weighting factor *f* of 0.06 to account for the much larger chemical shift dispersion in the <sup>13</sup>C  
550 dimension (ca. 60 ppm) compared to that in the <sup>1</sup>H dimension (ca. 3.5 ppm).

## 551 Data Availability

552 The coordinates and structure factors have been deposited in the Protein Data Bank under  
553 accession code 7B3A. Diffraction images have been deposited at [www.proteindiffraction.org](http://www.proteindiffraction.org).

## 554 References

- 555 1. Klein, A. M. *et al.* Importance of pollinators in changing landscapes for world crops.  
556 *Proc. Biol. Sci.* **274**, 303–313 (2007).
- 557 2. Cornman, R. S. *et al.* Pathogen webs in collapsing honey bee colonies. *PLoS One* **7**,  
558 e43562 (2012).
- 559 3. Genersch, E. *et al.* Reclassification of *Paenibacillus larvae* subsp. *pulvificiens* and  
560 *Paenibacillus larvae* subsp. *larvae* as *Paenibacillus larvae* without subspecies  
561 differentiation. *Int. J. Syst. Evol. Microbiol.* **56**, 501–511 (2006).
- 562 4. Lindström, A., Korpela, S. & Fries, I. Horizontal transmission of *Paenibacillus larvae*  
563 spores between honey bee (*Apis mellifera*) colonies through robbing. *Apidologie* **39**,  
564 515–522 (2008).
- 565 5. Genersch, E., Ashiralieva, A. & Fries, I. Strain- and genotype-specific differences in  
566 virulence of *Paenibacillus larvae* subsp. *larvae*, a bacterial pathogen causing  
567 American foulbrood disease in honeybees. *Appl. Environ. Microbiol.* **71**, 7551–7555  
568 (2005).
- 569 6. Rauch, S., Ashiralieva, A., Hedtke, K. & Genersch, E. Negative correlation between  
570 individual-insect-level virulence and colony-level virulence of *Paenibacillus larvae*, the  
571 etiological agent of american foulbrood of honeybees. *Appl. Environ. Microbiol.* **75**,  
572 3344–3347 (2009).
- 573 7. Djukic, M. *et al.* How to kill the honey bee larva: Genomic potential and virulence  
574 mechanisms of *Paenibacillus larvae*. *PLoS One* **9**, e90914 (2014).
- 575 8. Beims, H. *et al.* Discovery of *Paenibacillus larvae* ERIC V: Phenotypic and genomic  
576 comparison to genotypes ERIC I-IV reveal different inventories of virulence factors  
577 which correlate with epidemiological prevalences of American Foulbrood. *Int. J. Med.*

- 578 *Microbiol.* **310**, 151394 (2020).
- 579 9. Morrissey, B. J. *et al.* Biogeography of *Paenibacillus larvae*, the causative agent of  
580 American foulbrood, using a new multilocus sequence typing scheme. *Environ.*  
581 *Microbiol.* **17**, 1414–1424 (2015).
- 582 10. Fünfhaus, A., Poppinga, L. & Genersch, E. Identification and characterization of two  
583 novel toxins expressed by the lethal honey bee pathogen *Paenibacillus larvae*, the  
584 causative agent of American foulbrood. *Environ. Microbiol.* **15**, 2951–2965 (2013).
- 585 11. Ebeling, J. *et al.* Characterization of the toxin Plx2A, a RhoA-targeting ADP-  
586 ribosyltransferase produced by the honey bee pathogen *Paenibacillus larvae*. *Environ.*  
587 *Microbiol.* **19**, 5100–5116 (2017).
- 588 12. Garcia-Gonzalez, E. & Genersch, E. Honey bee larval peritrophic matrix degradation  
589 during infection with *Paenibacillus larvae*, the aetiological agent of American foulbrood  
590 of honey bees, is a key step in pathogenesis. *Environ. Microbiol.* **15**, 2894–2901  
591 (2013).
- 592 13. Garcia-Gonzalez, E. *et al.* *Paenibacillus larvae* Chitin-Degrading Protein PICBP49 Is a  
593 Key Virulence Factor in American Foulbrood of Honey Bees. *PLoS Pathog.* **10**,  
594 e1004284 (2014).
- 595 14. Poppinga, L. *et al.* Identification and functional analysis of the S-layer protein SplA of  
596 *Paenibacillus larvae*, the causative agent of American Foulbrood of honey bees. *PLoS*  
597 *Pathog.* **8**, e1002716 (2012).
- 598 15. Fünfhaus, A. & Genersch, E. Proteome analysis of *Paenibacillus larvae* reveals the  
599 existence of a putative S-layer protein. *Environ. Microbiol. Rep.* **4**, 194–202 (2012).
- 600 16. Müller, S., Garcia-Gonzalez, E., Genersch, E. & Süssmuth, R. D. Involvement of  
601 secondary metabolites in the pathogenesis of the American foulbrood of honey bees  
602 caused by *Paenibacillus larvae*. *Nat. Prod. Rep.* **32**, 765–778 (2015).
- 603 17. Dang, T. & Süssmuth, R. D. Bioactive Peptide Natural Products as Lead Structures for  
604 Medicinal Use. *Acc. Chem. Res.* **50**, 1566–1576 (2017).
- 605 18. Hutchings, M., Truman, A. & Wilkinson, B. Antibiotics: past, present and future. *Curr.*  
606 *Opin. Microbiol.* **51**, 72–80 (2019).
- 607 19. Beceiro, A., Tomás, M. & Bou, G. Antimicrobial resistance and virulence: A successful  
608 or deleterious association in the bacterial world? *Clin. Microbiol. Rev.* **26**, 185–230  
609 (2013).
- 610 20. Wyatt, M. A. *et al.* *Staphylococcus aureus* nonribosomal peptide secondary  
611 metabolites regulate virulence. *Science* **329**, 294–296 (2010).
- 612 21. Süssmuth, R. D. & Mainz, A. Nonribosomal Peptide Synthesis—Principles and  
613 Prospects. *Angew. Chem. Int. Ed.* **56**, 3770–3821 (2017).
- 614 22. Müller, S. *et al.* Paenilamicin: Structure and biosynthesis of a hybrid nonribosomal

- 615 peptide/polyketide antibiotic from the bee pathogen *Paenibacillus larvae*. *Angew.*  
616 *Chem. Int. Ed.* **53**, 10821–10825 (2014).
- 617 23. Garcia-Gonzalez, E. *et al.* Biological effects of paenilamicin, a secondary metabolite  
618 antibiotic produced by the honey bee pathogenic bacterium *Paenibacillus larvae*.  
619 *MicrobiologyOpen* **3**, 642–656 (2014).
- 620 24. Holst, E. C. An antibiotic from a bee pathogen. *Science* **102**, 593–594 (1945).
- 621 25. Neuwald, A. F. & Landsman, D. GCN5-related histone *N*-acetyltransferases belong to  
622 a diverse superfamily that includes the yeast SPT10 protein. *Trends Biochem. Sci.* **22**,  
623 154–155 (1997).
- 624 26. Dyda, F., Klein, D. C. & Hickman, A. B. GCN5-related *N*-acetyltransferases: A  
625 structural overview. *Annu. Rev. Biophys. Biomol. Struct.* **29**, 81–103 (2000).
- 626 27. Magnet, S. & Blanchard, J. S. Molecular insights into aminoglycoside action and  
627 resistance. *Chem. Rev.* **105**, 477–498 (2005).
- 628 28. Bulatov, T. *et al.* Total synthesis and biological evaluation of paenilamicins from the  
629 honey bee pathogen *Paenibacillus larvae*. *Submitted* (2021).
- 630 29. Altschul, S. F., Gish, W., Miller, W., Myers, E. W. & Lipman, D. J. Basic local  
631 alignment search tool. *J. Mol. Biol.* **215**, 403–410 (1990).
- 632 30. Stohl, E. A., Brady, S. F., Clardy, J. & Handelsman, J. ZmaR, a novel and widespread  
633 antibiotic resistance determinant that acetylates zwittermicin A. *J. Bacteriol.* **181**,  
634 5455–5460 (1999).
- 635 31. Vetting, M. W. *et al.* Structure and functions of the GNAT superfamily of  
636 acetyltransferases. *Arch. Biochem. Biophys.* **433**, 212–226 (2005).
- 637 32. Krissinel, E. & Henrick, K. Secondary-structure matching (SSM), a new tool for fast  
638 protein structure alignment in three dimensions. *Acta Crystallogr. D Biol. Crystallogr.*  
639 **60**, 2256–2268 (2004).
- 640 33. Wolf, E. *et al.* Crystal Structure of a GCN5-Related *N*-acetyltransferase: *Serratia*  
641 *marcescens* Aminoglycoside 3-*N*-acetyltransferase. *Cell* **94**, 439–449 (1998).
- 642 34. Favrot, L., Blanchard, J. S. & Vergnolle, O. Bacterial GCN5-Related *N*-  
643 Acetyltransferases: From Resistance to Regulation. *Biochemistry* **55**, 989–1002  
644 (2016).
- 645 35. Vetting, M. W., Magnet, S., Nieves, E., Roderick, S. L. & Blanchard, J. S. A Bacterial  
646 Acetyltransferase Capable of Regioselective *N*-Acetylation of Antibiotics and Histones.  
647 *Chem. Biol.* **11**, 565–573 (2004).
- 648 36. Vetting, M. W., Hegde, S. S., Javid-Majd, F., Blanchard, J. S. & Roderick, S. L.  
649 Aminoglycoside 2'-*N*-acetyltransferase from *Mycobacterium tuberculosis* in complex  
650 with coenzyme A and aminoglycoside substrates. *Nat. Struct. Biol.* **9**, 653–658 (2002).
- 651 37. Vetting, M. W., Roderick, S. L., Yu, M. & Blanchard, J. S. Crystal structure of mycothiol

- 652 synthase (Rv0819) from *Mycobacterium tuberculosis* shows structural homology to the  
653 GNAT family of *N*-acetyltransferases. *Protein Sci.* **12**, 1954–1959 (2003).
- 654 38. Bhatnagar, R. S. *et al.* Structure of *N*-myristoyltransferase with bound myristoylCoA  
655 and peptide substrate analogs. *Nat. Struct. Biol.* **5**, 1091–1097 (1998).
- 656 39. Reimer, D., Pos, K. M., Thines, M., Grün, P. & Bode, H. B. A natural prodrug activation  
657 mechanism in nonribosomal peptide synthesis. *Nat. Chem. Biol.* **7**, 888–890 (2011).
- 658 40. Brotherton, C. A. & Balskus, E. P. A prodrug resistance mechanism is involved in  
659 colibactin biosynthesis and cytotoxicity. *J. Am. Chem. Soc.* **135**, 3359–3362 (2013).
- 660 41. Li, Y. *et al.* Directed natural product biosynthesis gene cluster capture and expression  
661 in the model bacterium *Bacillus subtilis*. *Sci. Rep.* **5**, (2015).
- 662 42. Li, Y.-X., Zhong, Z., Hou, P., Zhang, W.-P. & Qian, P.-Y. Resistance to nonribosomal  
663 peptide antibiotics mediated by D-stereospecific peptidases. *Nat. Chem. Biol.* **14**, 381–  
664 387 (2018).
- 665 43. Park, H. B., Perez, C. E., Perry, E. K. & Crawford, J. M. Activating and attenuating the  
666 amicoumacin antibiotics. *Molecules* **21**, 824 (2016).
- 667 44. Westman, E. L., Yan, M., Waglechner, N., Koteva, K. & Wright, G. D. Self resistance  
668 to the atypical cationic antimicrobial peptide edeine of *Brevibacillus brevis* Vm4 by the  
669 *N*-acetyltransferase EdeQ. *Chem. Biol.* **20**, 983–990 (2013).
- 670 45. Dingman, D. W. & Stahly, D. P. Medium promoting sporulation of *Bacillus larvae* and  
671 metabolism of medium components. *Appl. Environ. Microbiol.* **46**, 860–869 (1983).
- 672 46. Zarschler, K., Janesch, B., Zayni, S., Schaffer, C. & Messner, P. Construction of a  
673 gene knockout system for application in *Paenibacillus alvei* CCM 2051T, exemplified  
674 by the S-layer glycan biosynthesis initiation enzyme WsfP. *Appl. Environ. Microbiol.*  
675 **75**, 3077–3085 (2009).
- 676 47. Kabsch, W. XDS. *Acta Crystallogr. D Biol. Crystallogr.* **66**, 125–132 (2010).
- 677 48. McCoy, A. J. *et al.* Phaser crystallographic software. *J. Appl. Crystallogr.* **40**, 658–674  
678 (2007).
- 679 49. Langer, G., Cohen, S. X., Lamzin, V. S. & Perrakis, A. Automated macromolecular  
680 model building for X-ray crystallography using ARP/wARP version 7. *Nat. Protoc.* **3**,  
681 1171–1179 (2008).
- 682 50. Adams, P. D. *et al.* PHENIX: A comprehensive Python-based system for  
683 macromolecular structure solution. *Acta Crystallogr. D Biol. Crystallogr.* **66**, 213–221  
684 (2010).
- 685 51. Afonine, P. V. *et al.* Towards automated crystallographic structure refinement with  
686 phenix.refine. *Acta Crystallogr. D Biol. Crystallogr.* **68**, 352–367 (2012).
- 687 52. Emsley, P., Lohkamp, B., Scott, W. G. & Cowtan, K. Features and development of  
688 Coot. *Acta Crystallogr. D Biol. Crystallogr.* **66**, 486–501 (2010).

- 689 53. Word, J. M., Lovell, S. C., Richardson, J. S. & Richardson, D. C. Asparagine and  
690 glutamine: Using hydrogen atom contacts in the choice of side-chain amide  
691 orientation. *J. Mol. Biol.* **285**, 1735–1747 (1999).
- 692 54. Chen, V. B. *et al.* MolProbity: All-atom structure validation for macromolecular  
693 crystallography. *Acta Crystallogr. D Biol. Crystallogr.* **66**, 12–21 (2010).
- 694 55. Baker, N. A., Sept, D., Joseph, S., Holst, M. J. & McCammon, J. A. Electrostatics of  
695 nanosystems: Application to microtubules and the ribosome. *Proc. Natl. Acad. Sci. U.*  
696 *S. A.* **98**, 10037–10041 (2001).
- 697 56. Holm, L. & Rosenström, P. Dali server: Conservation mapping in 3D. *Nucleic Acids*  
698 *Res.* **38**, W545-549 (2010).
- 699 57. PDBePISA (Proteins, Interfaces, Structures and Assemblies). Available at:  
700 [https://www.ebi.ac.uk/pdbe/prot\\_int/pistart.html](https://www.ebi.ac.uk/pdbe/prot_int/pistart.html).
- 701 58. Krissinel, E. & Henrick, K. Inference of Macromolecular Assemblies from Crystalline  
702 State. *J. Mol. Biol.* **372**, 774–797 (2007).
- 703 59. Goddard, T. D. & Kneller, D. G. Sparky 3. (2008).
- 704 60. Lee, W., Tonelli, M. & Markley, J. L. NMRFAM-SPARKY: Enhanced software for  
705 biomolecular NMR spectroscopy. *Bioinformatics* **31**, 1325–1327 (2015).
- 706 61. Lee, W. *et al.* Integrative NMR for biomolecular research. *J. Biomol. NMR* **64**, 307–332  
707 (2016).
- 708 62. Wishart, D. S. *et al.* 1H, 13C and 15N chemical shift referencing in biomolecular NMR.  
709 *J. Biomol. NMR* **6**, 135–140 (1995).
- 710 63. Markley, J. L. *et al.* Recommendations for the presentation of NMR structures of  
711 proteins and nucleic acids: IUPAC-IUBMB-IUPAB Inter-Union Task Group on the  
712 Standardization of Data Bases of Protein and Nucleic Acid Structures Determined by  
713 NMR Spectroscopy. *J. Biomol. NMR* **12**, 1–23 (1998).
- 714 64. Williamson, M. P. Using chemical shift perturbation to characterise ligand binding.  
715 *Prog. Nucl. Magn. Reson. Spectrosc.* **73**, 1–16 (2013).

## 716 Acknowledgements

717 We thank the Deutsche Forschungsgemeinschaft (DFG, German Research Foundation) with  
718 SU 239/21-1 (project no. 279410221) and with RTG 2473 “Bioactive Peptides” (project no.  
719 392923329) for funding the project. This research was also funded by the Ministries  
720 responsible for Agriculture of the German Federal States of Brandenburg, Sachsen-Anhalt,  
721 Thüringen, Sachsen and the Senate of Berlin, Germany, as well as by the DFG, grant numbers  
722 GE1365/1-1, GE1365/1-2, and GE1365/2-1 to E.G. We are grateful to Claudia Alings, Freie  
723 Universität Berlin, for help with crystallization. We acknowledge access to beamlines of the  
724 BESSY II storage ring (Berlin, Germany) via the Joint Berlin MX-Laboratory sponsored by  
725 Helmholtz-Zentrum Berlin für Materialien und Energie, Freie Universität Berlin, Humboldt-

726 Universität zu Berlin, Max-Delbrück-Centrum, Leibniz-Institut für Molekulare Pharmakologie  
727 and Charité-Universitätsmedizin Berlin.

## 728 **Author information**

### 729 **Affiliations**

#### 730 **Institut für Chemie, Technische Universität Berlin, Berlin, Germany**

731 Tam Dang, Sebastian Müller, Ranko Skobalj, Timur Bulatov, Sebastian Gensel, Andi Mainz,  
732 Roderich D. Süssmuth

#### 733 **Institut für Chemie und Biochemie, Strukturbiochemie, Freie Universität Berlin, Berlin, 734 Germany**

735 Bernhard Loll, Markus C. Wahl

#### 736 **Macromolecular Crystallography, Helmholtz Zentrum Berlin für Materialien und Energie, 737 Berlin, Germany**

738 Markus C. Wahl

#### 739 **Institute for Bee Research, Department of Molecular Microbiology and Bee Diseases, 740 Hohen Neuendorf, Germany**

741 Julia Ebeling, Josefine Göbel, Elke Genersch

#### 742 **Institut für Mikrobiologie und Tierseuchen, Fachbereich Veterinärmedizin, Freie 743 Universität Berlin, Berlin, Germany**

744 Elke Genersch

### 745 **Contributions**

746 T.D., S.M., R.S., A.M. and R.D.S. designed the experiments. T.D., S.M. and R.S. purified  
747 paenilamicins and PamZ and also conducted the *in vitro* activation assays. T.D. set up the  
748 tandem-MS experiments and analyzed related data. B.L. performed the crystallization and  
749 elucidated the protein structure of PamZ. J.E. generated the deletion mutant *P. larvae*  $\Delta$ *pamZ*  
750 and performed the *in vivo* activation assay of paenilamicin against wild type and deletion  
751 mutant. T.B. and S.G. synthesized paenilamicin B2 and the two diastereomers. J.G. cultivated  
752 *P. larvae* wild type and deletion mutant  $\Delta$ *pamZ* and prepared the corresponding supernatants.  
753 A.M. performed the NMR experiments, acquired and analyzed the related data. T.D., M.C.W.,  
754 E.G., A.M. and R.D.S. wrote the manuscript.

### 755 **Ethics declarations**

#### 756 **Competing interests**

757 The authors declare no competing interests.



758 **Supplementary Information**

759 Supplementary Figures and Tables.
